# Supplementary material for: Single-cell analysis of human ovarian cortex identifies distinct cell populations but no oogonial stem cells
Source: PubMed Central journal article supplement (PMC7052271; doi:10.1038/s41467-020-14936-3), 2020-03-02
Supplement: 41467_2020_14936_MOESM1_ESM.pdf [file 41467_2020_14936_MOESM1_ESM.pdf]

1 **Single-cell analysis of human ovarian cortex identifies distinct cell populations but no**  
2 **oogonial stem cells.**

3

4 Magdalena Wagner, Masahito Yoshihara, Iyadh Douagi, Anastasios Damdimopoulos, Sarita  
5 Panula, Sophie Petropoulos, Haojiang Lu, Karin Pettersson, Kerstin Palm, Shintaro Katayama,  
6 Outi Hovatta, Juha Kere, Fredrik Lanner\*, Pauliina Damdimopoulou\*.

7

8

9 **INDEX**

10

11 **SUPPLEMENTARY FIGURES**

12 **Supplementary Figure 1** **Page 2**

13 **ScRNA-seq analysis of unsorted ovarian cortical cells.**

14 **Supplementary Figure 2** **Page 3**

15 Sorted ovarian DDX4 Ab+ and Ab- cortex cells.

16 **Supplementary Figure 3** **Page 5**

17 Validation of markers identified in transcriptomic and proteomic analysis.

18 **Supplementary Figure 4** **Page 7**

19 Germline-like cells in the adult human ovary.

20

21 **SUPPLEMENTARY TABLES**

22 **Supplementary Table 1**

23 **First surface marker screening of human ovarian cortex cells.** **Page 8**

24 **Second surface marker screening of human ovarian cortex cells.** **Page 13**

25 **Third surface marker screening of human ovarian cortex cells.** **Page 15**

26

27 **SUPPLEMENTARY DATA** **Page 17**

28 Separately attached as xlsx files.

29 **Supplementary Data 1**

30 Cell Ranger metrics and gene expression analysis of unsorted ovarian cortex cells.

31 **Supplementary Data 2**

32 Cell Ranger metrics and gene expression analysis of sorted ovarian cortex cells.

33 **Supplementary Data 3**

34 Upregulated genes in cultured human ovarian DDX4 Ab+ and DDX4 Ab- cells.

35

36 **REFERENCES** **Page 18**

37

38 **Supplementary Figure 1. ScRNA-seq analysis of unsorted ovarian cortical cells.****a**

|              | GRP   | C-sec |
|--------------|-------|-------|
| oocyte       | 4     | 14    |
| immune       | 19    | 29    |
| granulosa    | 5     | 132   |
| endothelial  | 140   | 494   |
| perivascular | 422   | 785   |
| stroma       | 5,125 | 4,991 |
| total        | 5,715 | 6,445 |

**b**

Density based hierarchical clustering (HDBSCAN)

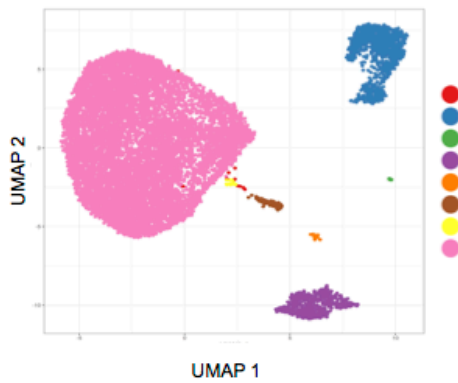**c**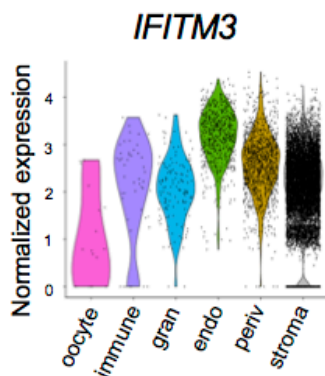

39  
40  
41  
42  
43  
44  
45

**Supplementary Figure 1. ScRNA-seq analysis of unsorted ovarian cortical cells.** **a**, Number of cells contributing to the different cell clusters from GRP and C-sec tissue (in Fig. 2b). **b**, Confirmation of cluster identification using HDBSCAN. **c**, Violin plot showing the expression levels of *IFITM3* in unsorted ovarian cortex cells.

46 **Supplementary Figure 2. Sorted ovarian DDX4 Ab+ and Ab- cortex cells.**

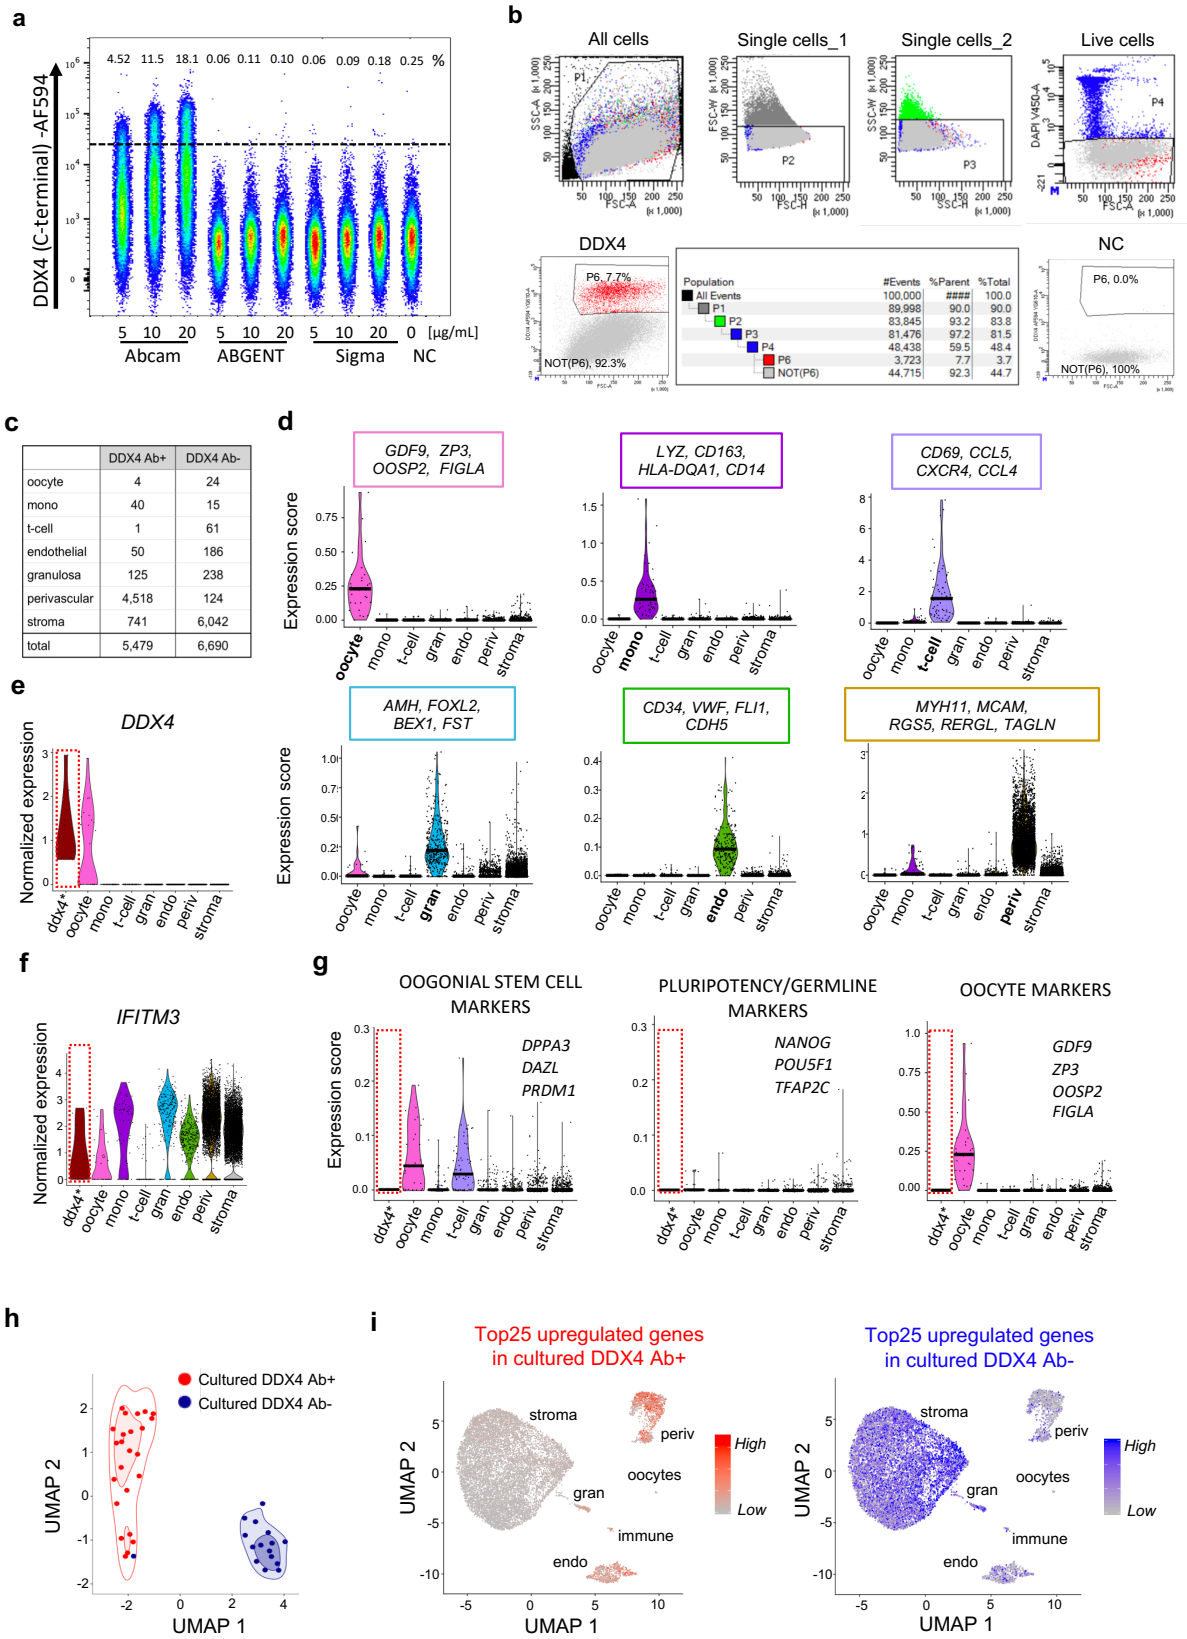

47  
48 **Supplementary Figure 2. Sorted ovarian DDX4 Ab+ and Ab- cortex cells.** a, FACS plots  
49 of three different DDX4 C-terminus antibodies (Abcam, ABGENT, and Sigma) in three different  
50 staining concentrations (5, 10 and 20 µg/mL per sample containing max  $1 \times 10^6$  cells in 100

51  $\mu\text{L}$ ) are shown. The Abcam Ab labeled an increasing percentage of a distinct cell population  
52 (4.51% - 18.1%) with increasing concentration while ABGENT and Sigma antibodies did not.  
53 Gating of DDX4 Ab<sup>+</sup> cells was performed on cells stained for rabbit polyclonal isotype control  
54 Ab. **b**, Representative FACS plots showing the gating strategy of dissociated ovarian tissue  
55 cells for sorting of DDX4 Ab<sup>+</sup> cells for scRNA-seq analysis. After exclusion of debris, single  
56 cells were gated based on FSC and SSC properties. Live cells were selected based on DAPI  
57 signal. Gating of DDX4 Ab<sup>+</sup> cells was based on FSC and distinct Ab signal. Several negative  
58 control samples were included in each sort (DAPI only, primary Ab omitted, FMO as well as  
59 rabbit polyclonal isotype control, labelled here as NC) to avoid false positive DDX4 Ab<sup>+</sup> cells.  
60 On average, a DDX4 Ab<sup>+</sup> cell population of 5.5 – 11.5% was observed. **c**, Contribution of cells  
61 from sorted DDX4 Ab<sup>+</sup> and DDX4 Ab<sup>-</sup> populations to each cluster (in Fig. 3b). **d**, Color-coded  
62 violin plots showing expression scores of selected signature genes among the top highly  
63 expressed genes defining the cell type of each cluster. **e**, Somatic cells expressing *DDX4*  
64 ( $n=12$ ;  $n=1$  in Ab<sup>+</sup> population and  $n=11$  in Ab<sup>-</sup> population) were manually clustered to form a  
65 separate cluster (*ddx4\**). **f**, Violin plot showing the expression levels of *IFITM3* in all sorted  
66 ovarian cortex cells. **g**, Violin plots showing OSC (*DPPA3*, *DAZL*, *PRDM1*), pluripotency and/or  
67 germline (*NANOG*, *POU5F1*, *TFAP2C*) and oocyte markers (*GDF9*, *ZP3*, *OOSP2*, *FIGLA*) as  
68 expression score. None of the markers were expressed in somatic DDX4 expressing cells  
69 (except from *IFITM3*). **h**, UMAP based on single-cell transcriptomes of cultured DDX4 Ab<sup>+</sup> and  
70 Ab<sup>-</sup> cells showing that the populations cluster separately even after extended time in cell  
71 culture in OSC culture conditions. Contour lines indicate the 2D kernel density for each cell  
72 population divided into three bins. **i**, Feature plots showing the expression score of the top 25  
73 upregulated genes of cultured DDX4 Ab<sup>+</sup> (scale bar depicting low expression in grey and high  
74 expression in red) and DDX4 Ab<sup>-</sup> cells (scale bar depicting low expression in grey and high  
75 expression in blue) in our freshly sequenced unsorted ovarian cells.  
76 **Horizontal bars in violin plots indicate median gene expression per cluster.**  
77 Ab, Antibody; FACS, Fluorescence Activated Cell Sorting; FMO, Fluorescence Minus One;  
78 FSC, Forward Scatter; NC, Negative Control; OSC, Oogonial Stem Cell; PCA, Principal  
79 Component Analysis; SSC, Side Scatter.



80 **Supplementary Figure 3. Validation of markers identified in transcriptomic and**  
 81 **proteomic analysis.**

**a**

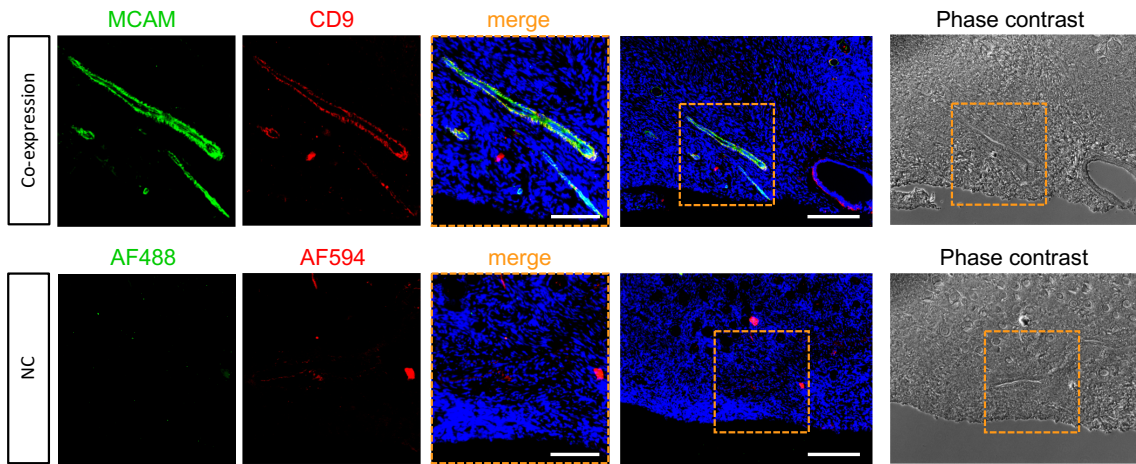

**b**

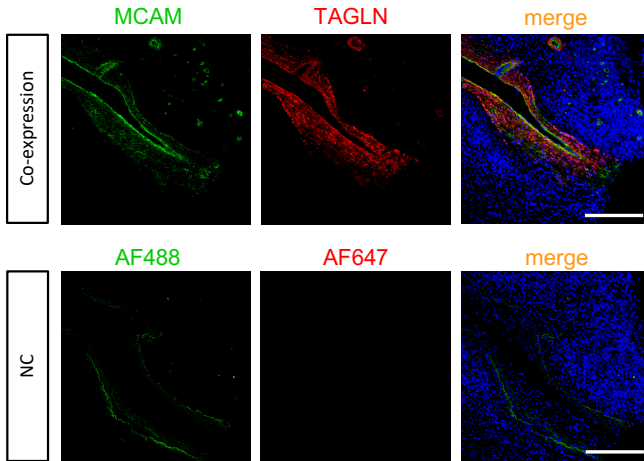

**c**

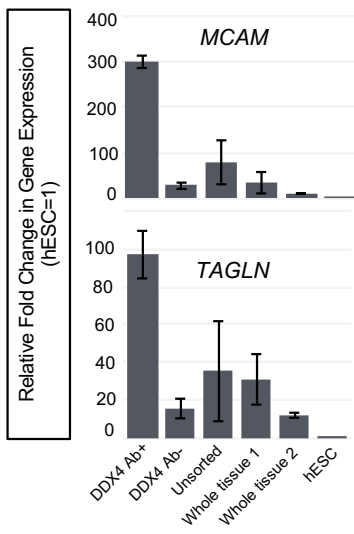

82  
83

84 **Supplementary Figure 3. Validation of markers identified in transcriptomic and**  
85 **proteomic analysis. a**, Immunostaining of human ovarian cortical tissue sections from GRP  
86 donor showing the expression of MCAM (green) and CD9 (red) on a protein level. DAPI (blue)  
87 was used as nuclear counterstain. Co-expression was detected in cells of blood vessels  
88 (zoomed-out, scale bars: 200  $\mu\text{m}$ ). Orange rectangles demarcate the zoomed-in area (scale  
89 bars: 100  $\mu\text{m}$ ). Immunostaining was performed in three histological sections from three  
90 patients and a representative image is shown. **b**, Immunostaining of human ovarian cortical  
91 tissue sections from a GRP donor showing the protein expression of MCAM (green) and  
92 TAGLN (red) in cells of a blood vessel. Nuclei are counterstained using DAPI (blue). Scale  
93 bars: 200  $\mu\text{m}$ . Immunostaining was performed in three histological sections from two patients.  
94 All vessels stained positive for MCAM/TAGLN and a representative image is shown. **c**, Gene  
95 expression analysis of *MCAM* and *TAGLN* in sorted ovarian tissue cells from pooled GRP  
96 donors (DDX4 Ab+/-), unsorted ovarian tissue cells (DDX4 ab+ and Ab-) from three GRP  
97 donors dissociated during independent experiments and three pieces of whole tissue from  
98 two GRP donors, respectively. Values were normalized to *GAPDH* expression and displayed  
99 relative to hESC sample. Mean  $\pm$  SD is shown from three undissociated pieces of whole ovary  
100 tissue from two donors, respectively, three independently dissociated ovarian tissue samples,  
101 and three independently sorted DDX4 Ab+ and Ab- cell fractions.  
102 As negative control (NC) in immunostaining, primary antibodies were omitted.  
103 hESCs, human Embryonic Stem Cells.

104  
105**Supplementary Figure 4. Germline-like cells in the adult human ovary.**

## Integration with unsorted GRP data

| Integrated cluster ID | mitotic FGCs | RA resp. FGCs | meiotic FGCs | Oo-genesis | NA | endo-thelial | granulosa (w7-10) | granulosa (w10-20) | granulosa (w20-26) | GRP (5,715 cells) |
|-----------------------|--------------|---------------|--------------|------------|----|--------------|-------------------|--------------------|--------------------|-------------------|
|                       | mitotic FGCs | 426           | 14           | 0          | 0  | 17           | 0                 | 0                  | 0                  | 0                 |
| RA responsive FGCs    | 0            | 78            | 0            | 0          | 8  | 0            | 0                 | 0                  | 0                  | 0                 |
| meiotic FGCs          | 2            | 2             | 90           | 6          | 27 | 0            | 0                 | 0                  | 0                  | 0                 |
| oocytes/oogonia       | 0            | 0             | 0            | 25         | 1  | 0            | 0                 | 0                  | 0                  | 3                 |
| immune                | 0            | 0             | 0            | 0          | 33 | 0            | 0                 | 1                  | 0                  | 17                |
| granulosa             | 0            | 0             | 0            | 0          | 9  | 0            | 2                 | 2                  | 42                 | 1                 |
| endothelial           | 0            | 0             | 0            | 0          | 4  | 7            | 0                 | 0                  | 0                  | 131               |
| perivascular          | 12           | 0             | 0            | 0          | 14 | 0            | 2                 | 21                 | 2                  | 408               |
| stroma                | 5            | 0             | 3            | 0          | 67 | 1            | 33                | 47                 | 120                | 5,155             |

## Integration with sorted DDX4 Ab+ data

| Integrated cluster ID | mitotic FGCs | RA resp. FGCs | meiotic FGCs | Oo-genesis | NA | endo-thelial | granulosa (w7-10) | granulosa (w10-20) | granulosa (w20-26) | DDX4 Ab+ (5,479 cells) |
|-----------------------|--------------|---------------|--------------|------------|----|--------------|-------------------|--------------------|--------------------|------------------------|
|                       | mitotic FGCs | 409           | 1            | 2          | 0  | 31           | 0                 | 0                  | 25                 | 10                     |
| RA responsive FGC     | 2            | 92            | 1            | 1          | 13 | 0            | 0                 | 0                  | 0                  | 0                      |
| meiotic FGCs          | 0            | 1             | 89           | 7          | 26 | 0            | 0                 | 0                  | 0                  | 0                      |
| oocytes/oogonia       | 0            | 0             | 0            | 23         | 1  | 0            | 0                 | 0                  | 0                  | 2                      |
| immune                | 0            | 0             | 0            | 0          | 32 | 0            | 0                 | 1                  | 0                  | 40                     |
| granulosa             | 1            | 0             | 1            | 0          | 30 | 1            | 14                | 3                  | 111                | 124                    |
| endothelial           | 0            | 0             | 0            | 0          | 4  | 7            | 0                 | 0                  | 0                  | 50                     |
| perivascular          | 32           | 0             | 0            | 0          | 29 | 0            | 0                 | 38                 | 24                 | 4,495                  |
| stroma                | 1            | 0             | 0            | 0          | 14 | 0            | 23                | 4                  | 19                 | 767                    |

## Integration with sorted DDX4 Ab- data

| Integrated cluster ID | mitotic FGCs | RA resp. FGCs | meiotic FGCs | Oo-genesis | NA | endo-thelial | granulosa (w7-10) | granulosa (w10-20) | granulosa (w20-26) | DDX4 Ab- (6,690 cells) |
|-----------------------|--------------|---------------|--------------|------------|----|--------------|-------------------|--------------------|--------------------|------------------------|
|                       | mitotic FGCs | 437           | 2            | 2          | 0  | 24           | 0                 | 1                  | 0                  | 0                      |
| RA responsive FGC     | 0            | 90            | 0            | 0          | 10 | 0            | 0                 | 0                  | 0                  | 0                      |
| meiotic FGCs          | 1            | 2             | 88           | 8          | 18 | 0            | 0                 | 0                  | 0                  | 0                      |
| oocytes/oogonia       | 0            | 0             | 0            | 23         | 1  | 0            | 0                 | 0                  | 0                  | 21                     |
| immune                | 0            | 0             | 0            | 0          | 34 | 0            | 0                 | 1                  | 0                  | 74                     |
| granulosa             | 0            | 0             | 2            | 0          | 30 | 0            | 3                 | 17                 | 79                 | 244                    |
| endothelial           | 0            | 0             | 0            | 0          | 4  | 7            | 0                 | 0                  | 0                  | 188                    |
| perivascular          | 0            | 0             | 0            | 0          | 0  | 0            | 0                 | 0                  | 0                  | 108                    |
| stroma                | 7            | 0             | 1            | 0          | 59 | 1            | 33                | 53                 | 85                 | 6,053                  |

106  
107  
108  
109  
110  
111  
112  
113  
114  
115  
116

**Supplementary Figure 4. Germline-like cells in the adult human ovary.** Our adult ovarian cortex datasets were integrated with a publicly available fetal ovary scRNA-seq dataset [1] in order to find any adult cells that would cluster with pre-meiotic germ cells. Integration was carried out sample by sample in order to avoid bias caused by disproportionate cell numbers between the datasets. Numbers of cells contributing to the integrated clusters from fetal and adult samples are shown for each comparison. Integration with unsorted C-sec sample is displayed in Fig. 5. Adult cells clustering with pre-meiotic germ cells are highlighted in red.

117 **Supplementary Table 1. First surface marker screening of human ovarian cortex cells.**  
 118

## Screen 1

| Surface Marker | % CD-POS | MFI   |
|----------------|----------|-------|
| CD47           | 99,4     | 57332 |
| CD59           | 99,4     | 99797 |
| CD147          | 99,3     | 18778 |
| CD55           | 96,3     | 13128 |
| CD58           | 93,6     | 8389  |
| CD95           | 83,2     | 8813  |
| CD46           | 82,2     | 10896 |
| CD29           | 80,4     | 18113 |
| CD166          | 80,2     | 13714 |
| CD49c          | 80,1     | 14038 |
| CD44           | 79,7     | 8886  |
| CD151          | 79,2     | 12902 |
| CD63           | 78,5     | 6336  |
| CD164          | 77,7     | 7817  |
| CD140b         | 77,2     | 19179 |
| CD81           | 77,1     | 7447  |
| CD165          | 71,5     | 9929  |
| CD73           | 68,1     | 30713 |
| CD268          | 67,4     | 3064  |
| CD49a          | 66,1     | 7902  |
| B2M            | 65,6     | 10503 |
| CD90           | 65,5     | 24181 |
| CD321          | 64,6     | 5080  |
| CD54           | 63,9     | 5922  |
| CD340          | 63,6     | 3193  |
| CD9            | 59,9     | 9134  |
| CD26           | 59,8     | 31591 |
| HLA-A,B,C      | 59,4     | 39782 |
| EFR-R          | 59,3     | 3458  |
| CD49e          | 57,7     | 9602  |
| CD105          | 57,2     | 11868 |
| CD62E          | 51       | 5876  |
| CD98           | 50,6     | 2857  |
| CD221          | 50,6     | 2538  |
| CD200          | 49,5     | 10743 |
| CD146          | 48,9     | 10298 |
| HLA-DQ         | 46,1     | 4438  |
| CD141          | 43,8     | 2941  |
| CD61           | 40,3     | 2857  |
| CD91           | 40       | 3508  |
| CD142          | 38,1     | 2749  |
| CD326          | 37,5     | 5511  |
| CD51/61        | 35,1     | 2913  |
| HPC            | 34,4     | 3424  |
| HLA-A2         | 34,1     | 12284 |
| CD338          | 32,5     | 2569  |
| CD34           | 31,1     | 4051  |
| CD71           | 30,8     | 2519  |
| CD140a         | 30,1     | 2453  |
| CD56           | 27,9     | 3500  |

|                 |      |       |
|-----------------|------|-------|
| CD275           | 26,1 | 2218  |
| CD49d           | 24,3 | 3367  |
| CD107a          | 23,6 | 2262  |
| CD144           | 23,5 | 6303  |
| HLA-DR          | 23,4 | 4831  |
| HLA-DR,DP,DQ    | 21,1 | 2736  |
| CD39            | 17,8 | 34067 |
| CD40            | 16   | 2405  |
| CD97            | 14,4 | 2477  |
| CD220           | 13,6 | 2073  |
| CD49b           | 13,4 | 2120  |
| CD243           | 12,5 | 4438  |
| CD226           | 11,9 | 2042  |
| CD227           | 11,6 | 2588  |
| CD235a          | 10,2 | 2142  |
| CD152           | 9,59 | 2104  |
| CD183           | 9,14 | 1996  |
| CD112           | 8,56 | 1996  |
| CD161           | 8,31 | 2042  |
| CD130           | 7,97 | 2062  |
| CD107b          | 7,82 | 2115  |
| CD126           | 7,82 | 1996  |
| SSEA-4          | 7,54 | 6643  |
| CD102           | 7,25 | 2441  |
| CD77            | 7,17 | 2690  |
| CD181           | 6,64 | 2062  |
| CD109           | 5,74 | 1945  |
| CD184           | 5,66 | 2174  |
| CDw329          | 5,53 | 1991  |
| CD124           | 5,19 | 1935  |
| CD314           | 4,92 | 1911  |
| CD271           | 4,84 | 3334  |
| CD205           | 4,41 | 2057  |
| CD309           | 4,35 | 7388  |
| CD336           | 4,32 | 2223  |
| Invariant NK    | 4,25 | 2062  |
| Gamma delta TCR | 4,12 | 5801  |
| CD162           | 4,03 | 1975  |
| CD11a           | 4,01 | 2089  |
| CD72            | 3,97 | 1980  |
| CD22            | 3,91 | 1955  |
| BLTR-1          | 3,72 | 1950  |
| CD66(a,c,d,e)   | 3,63 | 3391  |
| CD121b          | 3,6  | 2158  |
| CD13            | 3,52 | 2837  |
| CD274           | 3,26 | 2026  |
| CD10            | 3,14 | 2370  |
| GD2             | 2,91 | 3208  |
| CD4v4           | 2,85 | 2268  |
| CD31            | 2,77 | 4770  |
| CD27            | 2,53 | 2115  |
| CD206           | 2,36 | 2447  |
| CD45RA          | 2,29 | 2037  |
| CD14            | 2,21 | 2052  |
| CD195           | 2,19 | 2163  |
| CD83            | 2,18 | 2089  |
| CD197           | 2,17 | 2201  |

|              |      |      |
|--------------|------|------|
| CD244        | 2,16 | 6125 |
| CLIP         | 2,15 | 2052 |
| CD231        | 2,13 | 2324 |
| CD150        | 2,11 | 2136 |
| CD38         | 1,9  | 2394 |
| CD74         | 1,89 | 2364 |
| CD36         | 1,88 | 3508 |
| CD80         | 1,87 | 2201 |
| CD117        | 1,82 | 2330 |
| CD45RO       | 1,79 | 2251 |
| CD41b        | 1,74 | 2465 |
| CD134        | 1,72 | 2207 |
| CD84         | 1,7  | 2115 |
| CD123        | 1,69 | 2330 |
| CD75         | 1,65 | 2550 |
| CD53         | 1,64 | 2613 |
| CD32         | 1,55 | 2256 |
| CD273        | 1,53 | 2723 |
| CD85         | 1,49 | 2544 |
| CD177        | 1,46 | 2273 |
| MIC A/B      | 1,45 | 2163 |
| CD88         | 1,45 | 2336 |
| CD196        | 1,45 | 2229 |
| CD229        | 1,39 | 2526 |
| CD62P        | 1,34 | 2857 |
| CD118        | 1,33 | 2152 |
| CD172b       | 1,32 | 2229 |
| CD18         | 1,31 | 2394 |
| CD64         | 1,3  | 2723 |
| CD171        | 1,3  | 3247 |
| CD57         | 1,29 | 2507 |
| CD193        | 1,29 | 2749 |
| CD45         | 1,27 | 2313 |
| CD79b        | 1,26 | 2347 |
| CD163        | 1,26 | 2532 |
| CD337        | 1,23 | 2083 |
| CDMR-56      | 1,23 | 2336 |
| CD50         | 1,23 | 2899 |
| CD137 Ligand | 1,21 | 2459 |
| CDw328       | 1,2  | 2158 |
| CD15         | 1,2  | 2417 |
| CD62L        | 1,19 | 2399 |
| CD153        | 1,17 | 2388 |
| CD278        | 1,17 | 2913 |
| CD69         | 1,15 | 2716 |
| NKB1         | 1,11 | 2532 |
| CD178        | 1,11 | 2697 |
| CD209        | 1,11 | 2465 |
| CMRF-44      | 1,1  | 2626 |
| CD11b        | 1,09 | 2471 |
| CD45RB       | 1,09 | 2268 |
| CD99         | 1,09 | 2423 |
| CD158b       | 1,09 | 2581 |
| CDw327       | 1,08 | 2273 |
| CD279        | 1,06 | 2411 |
| CD108        | 1,06 | 2569 |
| SSEA-1       | 1,05 | 2296 |

|                |      |      |
|----------------|------|------|
| CD48           | 1,05 | 2613 |
| CD282          | 1,03 | 2262 |
| CD5            | 1,03 | 2899 |
| CD70           | 1,03 | 2683 |
| CD20           | 1,01 | 2290 |
| CD30           | 1,01 | 2405 |
| CD35           | 1,01 | 2405 |
| CD99R          | 1,01 | 2110 |
| Vbeta8         | 1    | 2229 |
| CD16           | 1    | 2313 |
| Alpha beta TCR | 0,99 | 2581 |
| CD128          | 0,99 | 2507 |
| CD305          | 0,98 | 2223 |
| CDw93          | 0,98 | 2613 |
| CD135          | 0,97 | 3278 |
| CD66b          | 0,95 | 2600 |
| CD11c          | 0,94 | 2174 |
| CD43           | 0,94 | 2756 |
| CD106          | 0,94 | 2483 |
| fMLP-R         | 0,91 | 2477 |
| CD28           | 0,91 | 2330 |
| CD42a          | 0,91 | 2483 |
| CD3            | 0,9  | 2544 |
| CD21           | 0,88 | 2399 |
| CD42b          | 0,87 | 2489 |
| CD138          | 0,87 | 3050 |
| CD158a         | 0,87 | 2336 |
| CD33           | 0,85 | 2330 |
| CD122          | 0,85 | 2664 |
| CD137          | 0,85 | 2749 |
| TRA-1-81       | 0,84 | 2142 |
| CD1d           | 0,84 | 2158 |
| CD1a           | 0,82 | 2336 |
| CD8b           | 0,82 | 2495 |
| CD23           | 0,81 | 2588 |
| CD103          | 0,81 | 2083 |
| Vbeta23        | 0,8  | 2313 |
| CD66f          | 0,79 | 2168 |
| CD89           | 0,79 | 2364 |
| CD41a          | 0,78 | 2207 |
| CD86           | 0,78 | 2658 |
| C119           | 0,78 | 2218 |
| CD25           | 0,77 | 2716 |
| CD7            | 0,76 | 2723 |
| CD154          | 0,76 | 2501 |
| CD37           | 0,75 | 2429 |
| CD87           | 0,74 | 2201 |
| CD180          | 0,74 | 2453 |
| CD255          | 0,74 | 6875 |
| CD6            | 0,73 | 2262 |
| CD114          | 0,73 | 3154 |
| CD2            | 0,72 | 2126 |
| CD1b           | 0,71 | 2273 |
| CD121a         | 0,71 | 2423 |
| TRA-1-60       | 0,69 | 2519 |
| CD19           | 0,69 | 2556 |
| CD127          | 0,68 | 2364 |



|        |      |      |
|--------|------|------|
| CD24   | 0,67 | 2417 |
| CD100  | 0,67 | 2613 |
| CD8a   | 0,66 | 2376 |
| CD116  | 0,66 | 2212 |
| CD335  | 0,64 | 2313 |
| CD94   | 0,64 | 2218 |
| CD120a | 0,62 | 2382 |
| CD4    | 0,58 | 2353 |
| CD15s  | 0,56 | 2477 |

119

120

121

122

123

124

**Supplementary Table 1. First surface marker screening of human ovarian cortex cells.**

Percentage of ovarian cortex cells positive for 242 CD markers and corresponding MFI values.

CD, Cluster of differentiation; MFI, Mean fluorescence intensity.

125 **Supplementary Table 2. Second surface marker screening of human ovarian cortex**  
 126 **cells.**  
 127

## Screen 2

| Surface Marker | % CD-POS | MFI    |
|----------------|----------|--------|
| CD49a          | 99,7     | 76235  |
| CD61           | 99,3     | 467000 |
| CD151          | 99,2     | 18996  |
| CD56           | 96       | 16101  |
| CD59           | 93       | 9308   |
| CD47           | 87,4     | 9798   |
| CD98           | 86,8     | 8263   |
| CD141          | 86,5     | 21738  |
| CD39           | 85,2     | 19692  |
| CD200          | 83,8     | 17174  |
| CD49e          | 83,5     | 15692  |
| HLA A2         | 81,8     | 26911  |
| CD165          | 81,3     | 13136  |
| CD166          | 79       | 12261  |
| CD29           | 74,2     | 27183  |
| CD90           | 71,1     | 9798   |
| HLA-DQ         | 70,5     | 22470  |
| CD104          | 69,9     | 7883   |
| CD73           | 69,4     | 5951   |
| CD95           | 69,4     | 16953  |
| CD26           | 69,1     | 8486   |
| CD51/61        | 68,1     | 11002  |
| CD63           | 66,5     | 8900   |
| CD107a         | 66,5     | 8953   |
| CD221          | 66       | 11559  |
| CD81           | 64,5     | 46349  |
| CD268          | 57       | 3003   |
| CD49c          | 56,1     | 5310   |
| CD336          | 55,6     | 5138   |
| HLA-DR         | 53,3     | 5581   |
| B2M            | 52,4     | 2979   |
| CD55           | 46,7     | 5266   |
| CD2            | 37,9     | 2933   |
| HLA A,B,C      | 37,4     | 3732   |
| CD105          | 34,2     | 2895   |
| CD140b         | 31,9     | 2655   |
| CD210          | 27,2     | 2979   |
| CD147          | 25,4     | 7746   |
| CD144          | 25,1     | 2987   |
| CD54           | 23,8     | 3164   |
| CD62E          | 23,7     | 3131   |
| CD142          | 21,6     | 3139   |
| CD340          | 18,4     | 2409   |
| CD146          | 15,8     | 5124   |
| HLA-DR,DP,DQ   | 15,7     | 4449   |
| CD58           | 13,7     | 2820   |
| CD44           | 13,6     | 41634  |
| SSEA-4         | 7,94     | 3458   |
| CD1b           | 4,81     | 2153   |

|             |      |      |
|-------------|------|------|
| CD120b      | 2,45 | 5013 |
| CLA         | 1,83 | 2733 |
| SSEA-3      | 0,98 | 2987 |
| CD309       | 0,93 | 2321 |
| CD267       | 0,93 | 2941 |
| CD3         | 0,82 | 2415 |
| CD338       | 0,79 | 2820 |
| HPC         | 0,76 | 2712 |
| Integrin b7 | 0,7  | 2655 |
| CD321       | 0,68 | 3018 |
| CD1a        | 0,64 | 2676 |
| CD1d        | 0,64 | 2513 |
| CD132       | 0,64 | 2641 |
| CD9         | 0,63 | 2600 |
| CD201       | 0,62 | 2539 |
| CD294       | 0,62 | 2655 |
| CD212       | 0,61 | 2956 |
| CD49f       | 0,33 | 2339 |
| CD46        | 0    | 9253 |
| CD71        | 0    | 7266 |
| gdTCR       | 0    | 7860 |
| CD326       | 0    | 5597 |

128  
129  
130  
131  
132  
133  
134  
135

**Supplementary Table 2. Second surface marker screening of human ovarian cortex cells.** Percentage of ovarian cortex cells positive for CD markers pre-selected in the first surface marker screening (Supplementary Table 1) and corresponding MFI values. Selected CD markers determined negative in Supplementary Table 1 are included as negative controls. CD, Cluster of differentiation; MFI, Mean fluorescence intensity.

136  
137**Supplementary Table 3. Third surface marker screening of human ovarian cortex cells.**

## Screen 3

| Surface Marker | % CD-POS | MFI   |
|----------------|----------|-------|
| CD47           | 99,4     | 55154 |
| CD147          | 90,9     | 22055 |
| CD55           | 86,6     | 17317 |
| CD58           | 83,1     | 14497 |
| CD63           | 72,4     | 10533 |
| CD164          | 71,5     | 12249 |
| CD46           | 70,1     | 12391 |
| CD29           | 68,7     | 31394 |
| CD151          | 68,7     | 23449 |
| CD26           | 63,5     | 30331 |
| CD95           | 63,4     | 11666 |
| CD44           | 60,7     | 14974 |
| CD9            | 59,8     | 18387 |
| CD49E          | 58,7     | 19121 |
| CD62E          | 57,7     | 18277 |
| CD166          | 56       | 17111 |
| HLA A,B,C      | 55,8     | 35270 |
| CD90           | 54,8     | 33430 |
| CD105          | 53,6     | 13997 |
| CD49C          | 51,4     | 28230 |
| CD140B         | 50,6     | 23812 |
| CD54           | 44       | 9792  |
| CD49F          | 41,3     | 11902 |
| CD165          | 39,8     | 13875 |
| CD200          | 36,7     | 13515 |
| CD321          | 32,8     | 9236  |
| CD49A          | 30,2     | 13052 |
| CD340          | 30,2     | 6353  |
| HLA-DQ         | 27,5     | 7212  |
| CD221          | 25       | 6222  |
| CD146          | 23,4     | 23739 |
| CD201          | 22,7     | 7548  |
| HLA-A2         | 19,9     | 29767 |
| CD81           | 18,8     | 7467  |
| HPC            | 18,3     | 8010  |
| B2M            | 15,6     | 15791 |
| CD98           | 14,3     | 6948  |
| CD144          | 14       | 11210 |
| CD146/MCAM     | 13,7     | 60966 |
| CD51/61        | 12,1     | 7368  |
| CD338          | 11,9     | 6015  |
| HLA-DR         | 11,8     | 9365  |
| CD39           | 11,6     | 47265 |
| CD141          | 10,8     | 6749  |
| CD91           | 10,7     | 6173  |
| CD142          | 7,26     | 6488  |
| HLA-DR,DQ,DP   | 7,23     | 8669  |
| CD42b          | 5,73     | 6488  |
| CD56           | 5,64     | 6141  |
| EGF-R          | 5,31     | 5771  |

|                        |      |      |
|------------------------|------|------|
| <b>CD42a</b>           | 5,31 | 6437 |
| <b>CD107A</b>          | 5,09 | 5625 |
| <b>CD43</b>            | 4,76 | 6336 |
| <b>SSEA-4</b>          | 3,43 | 9443 |
| <b>CD13</b>            | 2,42 | 7022 |
| <b>CD77</b>            | 2,33 | 6505 |
| <b>CD11C</b>           | 1,74 | 5984 |
| <b>CD268</b>           | 1,61 | 5756 |
| <b>CD4v4</b>           | 1,57 | 6173 |
| <b>CD4</b>             | 1,17 | 5712 |
| <b>CD326</b>           | 0,98 | 7135 |
| <b>Gamma delta TCR</b> | 0,66 | 6287 |

138  
139  
140  
141  
142  
143  
144  
145

**Supplementary Table 3. Third surface marker screening of human ovarian cortex cells.** Percentage of ovarian cortex cells positive for CD markers pre-selected in the first surface marker screening (Supplementary Table 1) and corresponding MFI values. Selected CD markers determined negative in Supplementary Table 1 are included as negative controls. CD, Cluster of differentiation; MFI, Mean fluorescence intensity.

146 **SUPPLEMENTARY DATA**

147

148 **Supplementary Data 1. Cell Ranger metrics and gene expression analysis of unsorted**  
149 **ovarian cortex cells.**

150 Sheet 'Stats': Cell Ranger metrics is listed for both samples of unsorted single cells dissociated  
151 from GRP and C-sec patients' ovarian cortex, respectively. After quality control and filtering,  
152 5,715 and 6,445 cells were kept for downstream analysis, respectively.

153 Sheet 'Variable genes clusters': List of markers per cluster identified using FindAllMarkers with  
154 default settings in Seurat.

155 Sheet 'ddx4': List of markers expressed in *DDX4* expressing somatic cells of the ovarian  
156 cortex. All markers of manually pooled somatic *DDX4* expressing cells were identified  
157 compared to all other clusters using FindMarkers with default settings in Seurat.

158

159 **Supplementary Data 2. Cell Ranger metrics and gene expression analysis of sorted**  
160 **ovarian cortex cells.**

161 Sheet 'Stats': Cell Ranger metrics is listed for both samples of sorted single cells dissociated  
162 from GRP ovarian cortex, *DDX4* Ab+ and Ab- cells, respectively. After quality control and  
163 filtering, 5,479 and 6,690 cells were kept for downstream analysis, respectively.

164 Sheet 'Variable genes clusters': List of markers per cluster identified using FindAllMarkers with  
165 default settings in Seurat.

166 Sheet 'Variable genes Orig.ident': List of markers per sample (*DDX4* Ab+ versus *DDX4* Ab-)  
167 identified using FindAllMarkers with default settings in Seurat.

168 Sheet 'ddx4': List of markers expressed in *DDX4* expressing somatic cells of the ovarian  
169 cortex. All markers of manually pooled somatic *DDX4* expressing cells were identified  
170 compared to all other clusters using FindMarkers with default settings in Seurat.

171

172 **Supplementary Data 3. Upregulated genes in cultured human ovarian *DDX4* Ab+ and**  
173 ***DDX4* Ab- cells.**

174 Sheet 'Up Down': List of genes identified as upregulated in cultured *DDX4* Ab+ and Ab- ovarian  
175 cortex cells, respectively, using featureCounts in EdgeR.

176 Sheet 'description': Description of all terms and abbreviations used in sheet 'Up Down'.

177 **REFERENCES**

- 178 1. Li, L., et al., *Single-Cell RNA-Seq Analysis Maps Development of Human*  
179 *Germline Cells and Gonadal Niche Interactions*. *Cell Stem Cell*, 2017. **20**(6): p. 858-  
180 873 e4.

181
