# Supplementary material for: Single-cell analysis of human ovarian cortex identifies distinct cell populations but no oogonial stem cells
Source: PubMed Central journal article supplement (PMC7052271; doi:10.1038/s41467-020-14936-3), 2020-03-02
Supplement: 41467_2020_14936_MOESM6_ESM.pdf [file 41467_2020_14936_MOESM6_ESM.pdf]

**Title:** Supplementary Data 1

**Description:** Cell Ranger metrics and gene expression analysis of unsorted ovarian cortex cells.

**Title:** Supplementary Data 2

**Description:** Cell Ranger metrics and gene expression analysis of sorted ovarian cortex cells.

**Title:** Supplementary Data 3

**Description:** Upregulated genes in cultured human ovarian DDX4 Ab+ and DDX4 Ab- cells.
